# Supplementary material for: Development and Evaluation of an Immunoinformatics-Based Multi-Peptide Vaccine against Acinetobacter baumannii Infection
Source: MDPI journal article supplement (doi:10.3390/vaccines12040358), 2024-03-27
Supplement: s1 [file s1]

pTonB

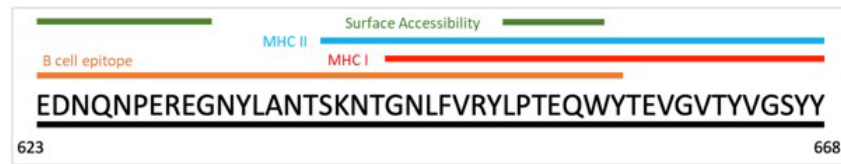

pNlpE

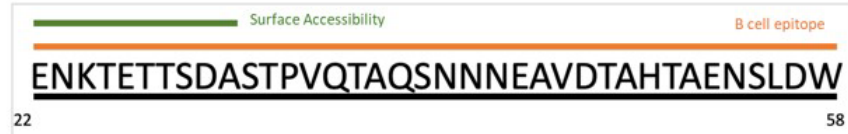

pNucAB

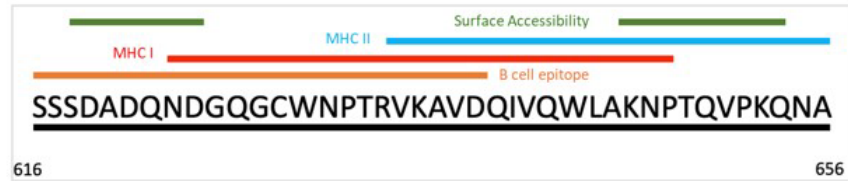

pOmp38

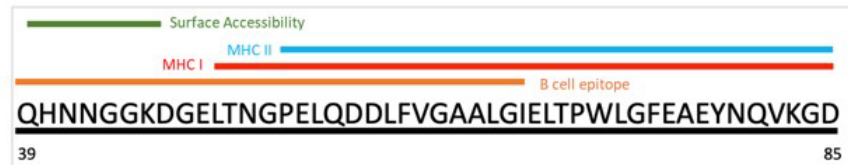

pZnuD

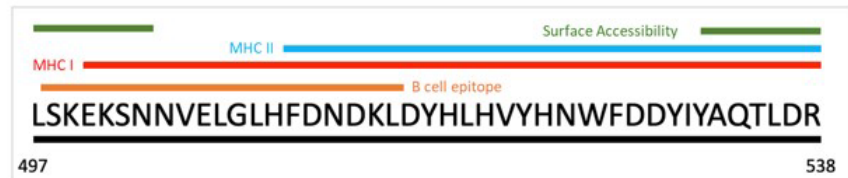

Figure S1. Graphical representation of *in silico* prediction of rAMEV2 peptides with EigenBio epitope prediction software.

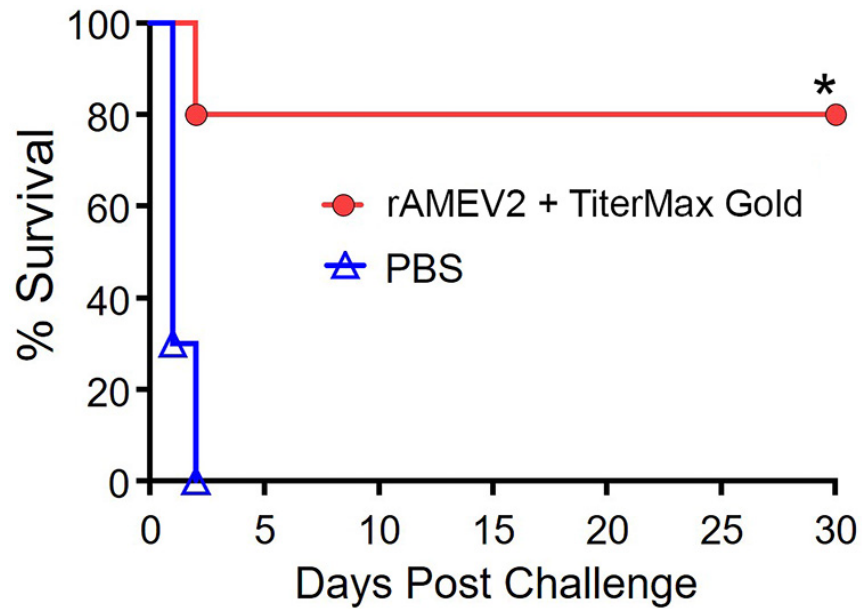

Figure S2. AMEV2 vaccination provides protection against systemic *Acinetobacter baumannii* infection. (A) 7-8 week old C57BL/6 mice ( $n = 10$  per group) were vaccinated subcutaneously with either PBS or rAMEV2 ( $5 \mu\text{g}$ ) + TiterMax Gold adjuvant. Mice were challenged with  $100 \mu\text{L}$  ( $2 \times 10^6$  CFU) ( $4 \times \text{LD}_{50}$ ) *A. baumannii* strain AB5075 intraperitoneally and monitored 30 days for survival. \*  $p < 0.05$  (Log-rank) between PBS and AMEV2 vaccinated mouse survival status over 30 days.
